# Supplementary material for: Changing surface ocean circulation caused the local demise of echinoid Scaphechinus mirabilis in Taiwan during the Pleistocene–Holocene transition
Source: PubMed Central journal article supplement (PMC9114427; doi:10.1038/s41598-022-11920-3), 2022-05-17
Supplement: 41598_2022_11920_MOESM1_ESM.pdf [file 41598_2022_11920_MOESM1_ESM.pdf]

**Changing surface ocean circulation caused the local demise  
of echinoid *Scaphechinus mirabilis* in Taiwan during  
the Pleistocene-Holocene transition**

Sze Ling Ho<sup>1</sup>, Jia-Kang Wang<sup>2</sup>, Yu-Jou Lin<sup>2</sup>, Ching-Ren Lin<sup>3</sup>, Chen-Wei Lee<sup>2</sup>, Chia-Hsin Hsu<sup>2</sup>, Lo-Yu Chang<sup>2</sup>, To-Hsiang Wu<sup>2</sup>, Chien-Chia Tseng<sup>2</sup>, Hsiao-Jou Wu<sup>2</sup>, Cédric M. John<sup>4</sup>, Tatsuo Oji<sup>5</sup>, Tsung-Kwei Liu<sup>2</sup>, Wen-Shan Chen<sup>2</sup>, Peter Li<sup>6</sup>, Jiann-Neng Fang<sup>7</sup>, and Jih-Pai Lin<sup>2\*</sup>

<sup>1</sup>Institute of Oceanography, National Taiwan University, Taipei, Taiwan

<sup>2</sup>Department of Geosciences, National Taiwan University, Taipei, Taiwan

<sup>3</sup>Institute of Earth Sciences, Academia Sinica, Taipei, Taiwan

<sup>4</sup>Imperial College London, Prince Consort Road, London, SW7 2BP, U.K.

<sup>5</sup>University Museum, Nagoya University, Furo-cho, Nagoya 464-8601, Japan

<sup>6</sup>Department of Earth Sciences, Tennessee Tech, Cookeville, TN 38505, USA

<sup>7</sup>Collection Management Department, National Taiwan Museum, Taipei City, Taiwan

\*Corresponding author Email: alexjplin@ntu.edu.tw

**Electronic Supplementary Material**

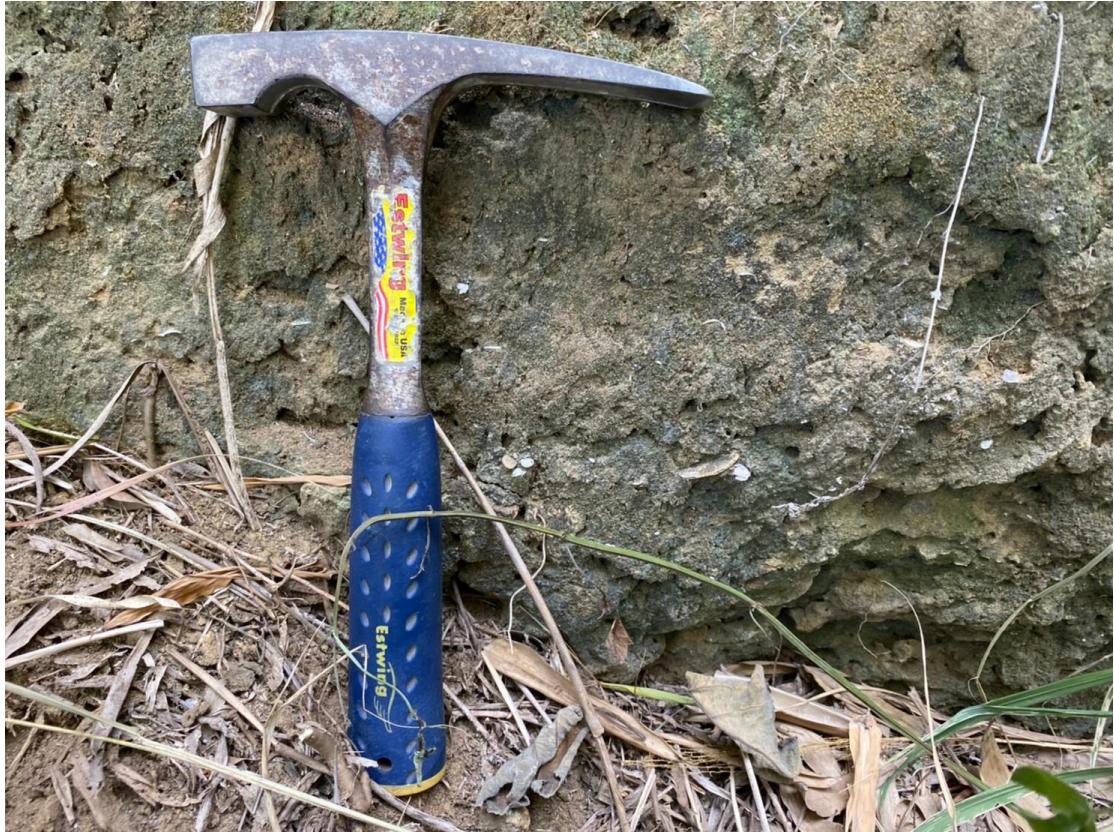

**Fig. S1.** Outcrop (site 1 on Fig. 2) photo of *Scaphechinus mirabilis* in Miaoli, Taiwan.

| Identifier | $\delta^{13}\text{C}_{\text{vpdb}}$ | $\delta^{18}\text{O}_{\text{vpdb}}$ | Location | Type   |
|------------|-------------------------------------|-------------------------------------|----------|--------|
| M001       | 0.289                               | 1.743                               | Japan    | living |
| M002       | 0.319                               | 1.922                               | Japan    | living |
| M003       | 0.567                               | 1.925                               | Japan    | living |
| M005       | 0.150                               | 1.909                               | Japan    | living |
| M006       | 0.386                               | 1.937                               | Japan    | living |
| M007       | 0.768                               | 1.732                               | Japan    | living |
| M012       | -1.487                              | 1.908                               | Japan    | living |
| M018       | -0.356                              | 0.983                               | Japan    | living |
| M032       | -0.031                              | 0.929                               | Japan    | living |
| M033       | -0.227                              | 0.845                               | Japan    | living |
| M034       | 0.233                               | 1.202                               | Japan    | living |
| M035       | -0.116                              | 1.159                               | Japan    | living |
| M036       | -0.092                              | 0.941                               | Japan    | living |
| M037       | -0.129                              | 0.874                               | Japan    | living |
| M038       | -0.079                              | 0.913                               | Japan    | living |
| M039       | -0.170                              | 1.715                               | Japan    | living |
| M040       | 0.029                               | 1.475                               | Japan    | living |
| M041       | -0.156                              | 1.055                               | Japan    | living |
| T001       | 1.446                               | 1.027                               | Taiwan   | fossil |
| T002       | -0.133                              | 0.403                               | Taiwan   | fossil |
| T003       | -0.081                              | 0.760                               | Taiwan   | fossil |
| T004       | -1.800                              | -0.391                              | Taiwan   | fossil |
| T005       | -0.991                              | -0.644                              | Taiwan   | fossil |
| T006       | 0.084                               | 0.177                               | Taiwan   | fossil |
| T007       | -1.460                              | 0.572                               | Taiwan   | fossil |
| T008       | 0.045                               | -0.408                              | Taiwan   | fossil |
| T009       | -0.657                              | 0.206                               | Taiwan   | fossil |
| T010       | -0.559                              | -0.398                              | Taiwan   | fossil |
| T013       | 0.346                               | 0.631                               | Taiwan   | fossil |
| T014       | 0.974                               | 1.527                               | Taiwan   | fossil |
| T015       | 0.242                               | 0.510                               | Taiwan   | fossil |
| M101A      | 1.027                               | 0.427                               | Taiwan   | fossil |
| M101C      | 1.290                               | 0.673                               | Taiwan   | fossil |
| SM002      | 0.573                               | 1.417                               | Japan    | living |

**Table S1.** Stable carbon and oxygen isotopes derived from both living and fossil sand dollar *S. mirabilis* (see Fig. 3A). Japanese specimens were collected from Mutsu Bay by Satoshi Takeda. Taiwanese samples were collected from Site 2 in Fig. 2.

| <b>Easotope Name</b>     | <b>M101A</b> | <b>M101C</b> | <b>SM002</b> |
|--------------------------|--------------|--------------|--------------|
| <b>Sample name</b>       | M101A        | M101C        | SM002        |
| <b>Mineralogy</b>        | Calcite      | Calcite      | Calcite      |
| <b>Nb replicates</b>     | 3            | 3            | 3            |
| <b>d13C VPDB</b>         | 1.027        | 1.290        | 0.573        |
| <b>d13C VPDB (SD)</b>    | 0.133        | 0.078        | 0.025        |
| <b>d13C VPDB (SE)</b>    | 0.077        | 0.045        | 0.015        |
| <b>d18O VPDB (Final)</b> | 0.427        | 0.673        | 1.417        |
| <b>d18O VPDB (SD)</b>    | 0.261        | 0.136        | 0.112        |
| <b>d18O VPDB (SE)</b>    | 0.151        | 0.079        | 0.064        |
| <b>D47 I-CDES</b>        | 0.625        | 0.644        | 0.647        |
| <b>D47 I-CDES (SD)</b>   | 0.008        | 0.004        | 0.026        |
| <b>D47 I-CDES (SE)</b>   | 0.004        | 0.002        | 0.015        |
| <b>Temperature (°C)</b>  | 14           | 9            | 8            |
| <b>Tmin [+1SE]</b>       | 13           | 8            | 4            |
| <b>Tmax [-1SE]</b>       | 16           | 9            | 12           |

**Table S2.** Clumped oxygen isotopes derived from both living and fossil sand dollar *S. mirabilis* (see Fig. 3B).

| <b>Longitude</b> | <b>Latitude</b> | <b>Water Depth (m)</b> | <b>Temp. (°C)</b> | <b>SD Temp. (°C)</b> |
|------------------|-----------------|------------------------|-------------------|----------------------|
| 120.5            | 24.5            | 0                      | 24.13             | 3.17                 |
| 120.5            | 24.5            | 5                      | 24.09             | 3.11                 |
| 120.5            | 24.5            | 10                     | 23.99             | 3.03                 |
| 120.5            | 24.5            | 15                     | 23.88             | 2.97                 |
| 120.5            | 24.5            | 20                     | 23.78             | 2.91                 |
| 120.5            | 24.5            | 25                     | 23.69             | 2.89                 |
| 120.5            | 24.5            | 30                     | 23.60             | 2.84                 |
| 120.5            | 24.5            | 35                     | 23.53             | 2.75                 |
| 120.5            | 24.5            | 40                     | 23.46             | 2.71                 |
| 120.5            | 24.5            | 45                     | 23.38             | 2.66                 |
| 120.5            | 24.5            | 50                     | 23.28             | 2.63                 |
|                  |                 | <b>MEAN</b>            | <b>23.71</b>      |                      |
|                  |                 | <b>SD</b>              | <b>0.29</b>       |                      |

**Table S3.** World Ocean Atlas 2018 (annual mean) data of ocean temperature at depths.

| <b>Longitude</b> | <b>Latitude</b> | <b>Water Depth (m)</b> | <b>Temp. (°C)</b> | <b>SD Temp. (°C)</b> |
|------------------|-----------------|------------------------|-------------------|----------------------|
| 120.75           | 24.5            | 5                      | 27.03             | 1.68                 |
| 120.75           | 24.5            | 10                     | 26.84             | 1.66                 |
| 120.75           | 24.5            | 15                     | 26.76             | 1.69                 |
| 120.75           | 24.5            | 20                     | 27.14             | 1.51                 |
| 120.75           | 24.5            | 25                     | 26.99             | 1.60                 |
| 120.75           | 24.5            | 30                     | 27.09             | 1.91                 |
| 120.75           | 24.5            | 35                     | 26.42             | 2.01                 |
| 120.75           | 24.5            | 40                     | 26.42             | 2.01                 |
| 120.75           | 24.5            | 45                     | 26.42             | 2.01                 |
| 120.75           | 24.5            | 50                     | 26.41             | 2.01                 |
|                  |                 | <b>MEAN</b>            | <b>26.75</b>      |                      |
|                  |                 | <b>SD</b>              | <b>0.31</b>       |                      |

**Table S4.** Ocean temperature at depths retrieved from Ocean Data Bank of the Ministry of Science and Technology, Republic of China (<http://www.odb.ntu.edu.tw/>).
